# Supplementary material
Source: publisher figshare collection journal article supplement (https://acs.figshare.com/ndownloader/files/20457987)
Supplement: Supplementary file 1 [file 20457987]

## **Diazepam prodrug stabilizes human aminopeptidase B during lyophilization**

Davin Rautiola<sup>1</sup>, Joel L. Updyke<sup>1</sup>, Kathryn M. Nelson<sup>2,3</sup>, and Ronald A. Siegel<sup>1,4,\*</sup>

<sup>1</sup>Department of Pharmaceutics, <sup>2</sup>Institute for Therapeutics Discovery & Development,

<sup>3</sup>Department of Medicinal Chemistry, <sup>4</sup>Department of Biomedical Engineering,

University of Minnesota, Minneapolis, MN

### SUPPLEMENTAL INFORMATION

*\*Corresponding Author:*

Ronald A. Siegel, Sc.D.

Professor, Department of Pharmaceutics, College of Pharmacy

University of Minnesota, Minneapolis, MN 55455

Ph: (612) 624 6164, Fax: (612) 626 2125

Email: [siege017@umn.edu](mailto:siege017@umn.edu)

**Table S1. Molar absorptivity temperature dependence.**

| Temp<br>(°C) | Molar Absorptivity<br>( $\mu\text{M}^{-1}\text{cm}^{-1}$ ) |         |
|--------------|------------------------------------------------------------|---------|
|              | LpNA                                                       | pNA     |
| 0            | 3.01E-05                                                   | 0.00948 |
| 5            | 3.27E-05                                                   | 0.00957 |
| 10           | 3.61E-05                                                   | 0.00964 |
| 15           | 4.01E-05                                                   | 0.00971 |
| 20           | 4.41E-05                                                   | 0.00977 |
| 25           | 4.86E-05                                                   | 0.00982 |
| 30           | 5.39E-05                                                   | 0.00986 |
| 32           | 5.59E-05                                                   | 0.00986 |
| 35           | 5.89E-05                                                   | 0.00987 |
| 40           | 6.49E-05                                                   | 0.00988 |
| 45           | 7.05E-05                                                   | 0.00986 |

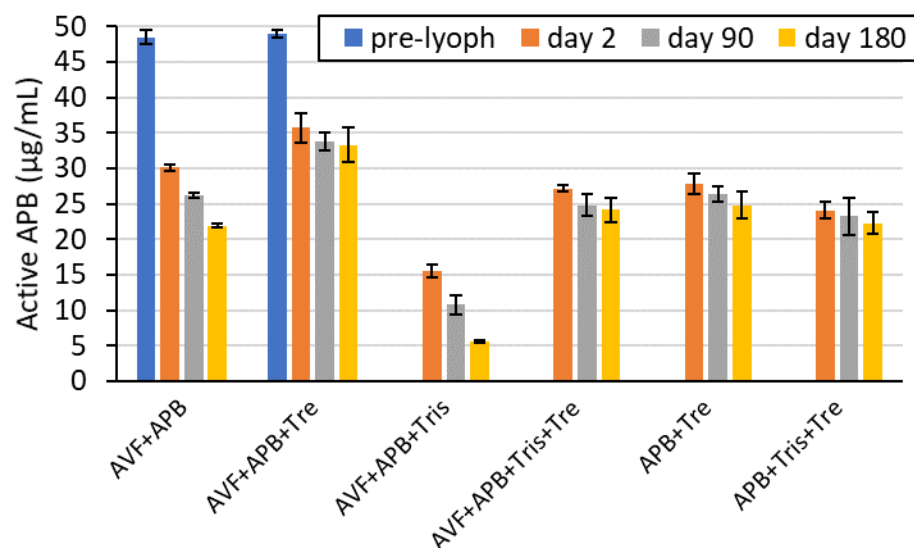

**Figure S1. Lyophilizates formulations buffered with Tris.** Optimum stability was achieved by co-lyophilization of APB+AVF+Tre without Tris buffer. Concentrations of active APB in the lyophilizates were measured in pH 7.4 PBS at 32 °C after storage for the specified time at 24 °C. Pre-lyophilization solutions contained AVF = 1.00 mM, APB = 50  $\mu\text{g}/\text{mL}$ , Tre = 12.5  $\text{mg}/\text{mL}$ , and/or pH 7.4 Tris buffer = 10 mM. Error bars are SD with  $n = 3$ .
